# Supplementary material for: Modified endoscopic mucosal resection techniques for treating precancerous colorectal lesions
Source: PubMed Central journal article supplement — Ann Gastroenterol. 2021 Jul 2;34(6):757–69. doi: 10.20524/aog.2021.0647 (PMC8596214; doi:10.20524/aog.2021.0647), 2021-07-02
Supplement: AnnGastroenterol-34-757_Supl1.pdf [file AnnGastroenterol-34-757_Supl1.pdf]

Supplementary material

**Supplementary Table 1** Data from studies evaluating the efficacy and safety of other EMR modifications (cap-assisted EMR, tip-in EMR, EMR precutting, EMR band ligation)

| Studies evaluating the efficacy and safety of cap-assisted EMR |               |                              |                 |                |                     |                            |                            |                                |                                |                                   |                               |                                        |                               |
|----------------------------------------------------------------|---------------|------------------------------|-----------------|----------------|---------------------|----------------------------|----------------------------|--------------------------------|--------------------------------|-----------------------------------|-------------------------------|----------------------------------------|-------------------------------|
| Author [Ref], year                                             | Country       | Study design                 | Study period    | No. of centers | No. of endoscopists | No. of patients            | No. of polyps              | Polyp size (mm)                | Complete resection rate (%)    | <i>En bloc</i> resection rate (%) | Recurrent/residual polyps (%) | Total resection time*                  | Adverse event rate (%)        |
| Conio <i>et al</i> [48], 2010                                  | Italy         | Dual-center, prospective     | 01/2000-12/2007 | 2              | NR                  | 255                        | 282 (146 SSPs, 135 LSTs)   | 25 for SSPs, 30 for LSTs       | NR                             | 0.0                               | 4.0                           | 40 min                                 | 8.6                           |
| Kashani <i>et al</i> [49], 2016                                | United States | Single-center, retrospective | 06/2009-10/2013 | 1              | 1                   | 97                         | 124                        | NR                             | 91.0                           | NR                                | NR                            | NR                                     | 10.2                          |
| Conio <i>et al</i> [50], 2010                                  | Italy         | Dual-center, Case series     | 01/2006-07/2008 | 1              | NR                  | 7                          | 7                          | 40                             | NR                             | NR                                | 0.0                           | 50min                                  | 28.5                          |
| Lew <i>et al</i> [51], 2019                                    | United States | Single-center, retrospective | 07/2008-11/2018 | 1              | 1                   | 21                         | 21                         | 15                             | 100.0                          | 33.3                              | 33.3                          | NR                                     | 24.0                          |
| Studies evaluating the efficacy and safety of Tip-in EMR       |               |                              |                 |                |                     |                            |                            |                                |                                |                                   |                               |                                        |                               |
| Author [Ref], year                                             | Country       | Study design                 | Study period    | No. of centers | No. of endoscopists | No. of patients            | No. of polyps              | Polyp size (mm)                | Complete resection rate (%)    | <i>En bloc</i> resection rate (%) | Recurrent/residual polyps (%) | Total resection time*                  | Adverse event rate (%)        |
| Pioche <i>et al</i> [53], 2019                                 | France        | Multi-center, retrospective  | 05/2017-01/2018 | 4              | 10                  | 125                        | 141                        | 19.8                           | 70.2                           | 84.6                              | NR                            | NR                                     | 4.0                           |
| Imai <i>et al</i> [54], 2020                                   | Japan         | Single-center, retrospective | 03/2014-12/2016 | 1              | NR                  | 72                         | 78                         | NR                             | NR                             | 85.9                              | 0.0                           | NR                                     | 1.3                           |
| Lee <i>et al</i> [55], 2019                                    | Taiwan        | Single-center, retrospective | 09/2015-09/2017 | 1              | 1                   | 42                         | 46                         | 20.4                           | NR                             | 100.0                             | 5.0                           | 14.9 min                               | 2.2                           |
| Sato <i>et al</i> [52], 2020†                                  | Japan         | Single-center, retrospective | 01/2010-01/2019 | 1              | 6                   | Tip-in vs. C-EMR 43 vs. 83 | Tip-in vs. C-EMR 43 vs. 83 | Tip-in vs. C-EMR 22.9 vs. 24.3 | Tip-in vs. C-EMR 76.3 vs. 54.1 | Tip-in vs. C-EMR 90.7 vs. 69.8    | Tip-in vs. C-EMR 0.0 vs. 7.0  | Tip-in vs. C-EMR 6.64 min vs. 10.4 min | Tip-in vs. C-EMR 46 vs. 3.6   |
| Noh <i>et al</i> [56], 2020†                                   | Korea         | Single-center, retrospective | 01/2018-09/2018 | 1              | 1                   | Tip-in vs. C-EMR 27 vs. 53 | Tip-in vs. C-EMR 38 vs. 74 | Tip-in vs. C-EMR 13.2 vs. 13.2 | Tip-in vs. C-EMR 76.3 vs. 54.1 | Tip-in vs. C-EMR 94.7 vs. 77      | NR                            | Tip-in vs. C-EMR 178 sec vs. 149 sec   | Tip-in vs. C-EMR 11.1 vs. 0.0 |

(Contd...)

**Supplementary Table 1 (Continued)**

Studies evaluating the efficacy and safety of EMR precutting

|                                       |       |                              |                    |   |    |                                      |                                    |                                        |                                        |                                        |      |                                       |                                      |
|---------------------------------------|-------|------------------------------|--------------------|---|----|--------------------------------------|------------------------------------|----------------------------------------|----------------------------------------|----------------------------------------|------|---------------------------------------|--------------------------------------|
| Lee <i>et al</i> [58], 2012           | Korea | Single-center, retrospective | 01/2004<br>11/2009 | 1 | 3  | 69                                   | 699                                | 28.9                                   | 59.4                                   | 65.2                                   | 3.1  | NR                                    | 15.9                                 |
| Sakamoto <i>et al</i> [59], 2012      | Japan | Single-center, retrospective | 03/2008<br>07/2009 | 1 | 2  | 24                                   | 24                                 | 20.9                                   | NR                                     | 67.0                                   | 0.0  | 40.0                                  | 0.0                                  |
| Terasaki <i>et al</i> [60] 2012       | Korea | Single-center, retrospective | 04/2006<br>12/2009 | 1 | 2  | 28                                   | 28                                 | 20.9                                   | NR                                     | NR                                     | 0.0  | NR                                    | NR                                   |
| Cheddy <i>et al</i> [61] 2012         | UK    | Single-center, prospective   | 2007<br>2014       | 1 | NR | 37                                   | 37                                 | 40.0                                   | NR                                     | 38.0                                   | 16.0 | NR                                    | 8.0                                  |
| Bhattacharyya <i>et al</i> [62], 2012 | UK    | Single-center, prospective   | 2007<br>2013       | 1 | 1  | 170                                  | 348                                | 46.0                                   | NR                                     | 41.0                                   | 13.1 | 150                                   | 8.2                                  |
| Yoshida <i>et al</i> [63], 2019       | Japan | Multicenter, retrospective   | 04/2011<br>05/2018 | 3 | NR | EMR precutting P vs. C-EMR 98 vs. 98 | EMR precutting vs. C-EMR 98 vs. 98 | EMR precutting vs. C-EMR 14.1 vs. 13.9 | EMR precutting vs. C-EMR 87.8 vs. 67.3 | EMR precutting vs. C-EMR 98.0 vs. 85.7 | NR   | EMR precutting vs. C-EMR 11.8 vs. 2.8 | EMR precutting vs. C-EMR 1.0 vs. 1.0 |
| Kim <i>et al</i> [64], 2013           | Korea | Single-center, retrospective | 03/2007<br>03/2011 | 1 | 3  | 91                                   | 91                                 | 20.9                                   | 51.6                                   | 61.5                                   | 0.0  | 30.0                                  | 6.5                                  |
| Jung <i>et al</i> [65], 2018          | Korea | Multicenter, prospective     | 01/2012<br>12/2013 | 5 | NR | 39                                   | 39                                 | 25.0                                   | 92.3                                   | 51.3                                   | NR   | 26.8                                  | 12.8                                 |

Meta-analyses evaluating the efficacy and safety of EMR precutting

| Method                         | No. of studies included | Study design                      | No. of patients | Complete resection rate             | <i>En bloc</i> resection rate       | Recurrent/residual polyp rate                | Adverse event rate                                   | Other outcomes                                                  |
|--------------------------------|-------------------------|-----------------------------------|-----------------|-------------------------------------|-------------------------------------|----------------------------------------------|------------------------------------------------------|-----------------------------------------------------------------|
| Fuccio <i>et al</i> [66], 2017 | 12                      | 3 prospective;<br>9 retrospective | 694             | Pooled rate: 60.6%, 95%CI 40.6-77.5 | Pooled rate: 68.4%, 95%CI 51.7-81.3 | Pooled rate 2.0%, 95%CI 0.7-5.6 at 12 months | Pooled rate 4.0%, 95%CI 2.8-5.8 for delayed bleeding | Higher R0 and <i>en bloc</i> resection rates in Asian countries |

(Contd...)

**Supplementary Table 1 (Continued)**

Studies evaluating the efficacy and safety of EMR with band ligation

| Author [Ref], year           | Country | Study design                 | Study period       | No. of centers | No. of endoscopists | No. of patients | No. of polyps                 | Polyp size (mm)                | Complete resection rate (%)      | En bloc resection rate (%)       | Recurrent/residual polyps (%)  | Total resection time*                 | Adverse event rate (%)         |
|------------------------------|---------|------------------------------|--------------------|----------------|---------------------|-----------------|-------------------------------|--------------------------------|----------------------------------|----------------------------------|--------------------------------|---------------------------------------|--------------------------------|
| Ono <i>et al</i> [70], 2003  | Japan   | Single-center, prospective   | 01/1999<br>01/2002 | 1              | NR                  | 28              | ESMR-L vs. C-EMR<br>14 vs.14  | ESMR-L vs. C-EMR<br>7.3 vs.6.9 | ESMR-L vs. C-EMR<br>100 vs.57    | NR                               | ESMR-L vs. C-EMR<br>0.0 vs.0.0 | NR                                    | NR                             |
| Ebi <i>et al</i> [72], 2018  | Japan   | Dual-center, prospective     | 05/2003<br>06/2002 | 2              | NR                  | 33              | ESMR-L vs. C-EMR<br>19 vs.14  | ESMR-L vs. C-EMR<br>5.0 vs.6.9 | ESMR-L vs. C-EMR<br>89.5 vs.50   | ESMR-L vs. C-EMR<br>100 vs.100   | ESMR-L vs. C-EMR<br>0.0 vs.0.0 | ESMR-L vs. C-EMR<br>6min vs.6.5min    | ESMR-L vs. C-EMR<br>0.0 vs.0.0 |
| Kim <i>et al</i> [73], 2011  | Korea   | Multicenter, retrospective   | 01/2004<br>12/2010 | 4              | NR                  | 100             | ESMR-L vs. C-EMR<br>45 vs.55  | ESMR-L vs. C-EMR<br>5.9 vs.6.3 | ESMR-L vs. C-EMR<br>100 vs.91    | ESMR-L vs. C-EMR<br>93.3 vs.65.5 | NR                             | ESMR-L vs. C-EMR<br>4.8min vs.5min    | ESMR-L vs. C-EMR<br>4.4 vs.0.0 |
| Lee <i>et al</i> [74], 2020  | Korea   | Single-center, retrospective | 11/2011<br>07/2009 | 1              | NR                  | 139             | ESMR-L vs. C-EMR<br>29 vs.110 | ESMR-L vs. C-EMR<br>7.7 vs.6.8 | ESMR-L vs. C-EMR<br>93.1 vs.74.5 | ESMR-L vs. C-EMR<br>100 vs.94.5  | NR                             | ESMR-L vs. C-EMR<br>10.7min vs.7.7min | ESMR-L vs. C-EMR<br>0.0 vs.0.0 |
| Choi <i>et al</i> [76], 2013 | Korea   | Single-center, prospective   | 2008<br>2011       | 1              | 2                   | 60              | EMR-L vs. ESD<br>29 vs. 31    | EMR-L vs. ESD<br>4.3 vs. 5.2   | EMR-L vs. ESD<br>82.8 vs. 80.6   | NR                               | NR                             | ESMR-L vs. C-EMR<br>6.3min vs.15.5min | ESMR-L vs. C-EMR<br>0.0 vs.3.2 |
| Bang <i>et al</i> [78], 2016 | Korea   | Single-center, prospective   | 01/2012<br>02/2016 | 1              | 4                   | 77              | EMR-L vs. ESD<br>53 vs. 24    | EMR-L vs. ESD<br>4.6 vs. 5.2   | EMR-L vs. ESD<br>100 vs. 54.2    | EMR-L vs. ESD<br>100 vs. 100     | EMR-L vs. ESD<br>0.0 vs. 4.2   | EMR-L vs. ESD<br>5.3min vs. 17.9 min  | EMR-L vs. ESD<br>0.0 vs. 0.0   |
| Lim <i>et al</i> [77], 2019  | Korea   | Single-center, retrospective | 01/2011<br>12/2012 | 1              | 2                   | 82              | EMR-L vs. ESD<br>66 vs. 16    | EMR-L vs. ESD<br>5.2 vs. 7.8   | EMR-L vs. ESD<br>100 vs. 100     | EMR-L vs. ESD<br>95.5 vs. 75     | EMR-L vs. ESD<br>0.0 vs. 0.0   | EMR-L vs. ESD<br>7.1min vs. 24.2 min  | EMR-L vs. ESD<br>0.0 vs. 0.0   |

Meta-analysis comparing the effect of EMR with band ligation vs. ESD for rectal neuroendocrine tumors

| Author, [Ref], year         | Method vs. comparator | No. of studies included | Study design                       | No. of patients | Complete resection rate  | En bloc resection rate | Recurrent/residual polyp rate | Adverse event rate       | Resection Time                 |
|-----------------------------|-----------------------|-------------------------|------------------------------------|-----------------|--------------------------|------------------------|-------------------------------|--------------------------|--------------------------------|
| Pan <i>et al</i> [79], 2018 | EMR-L vs. ESD         | 14                      | 2 prospective;<br>12 retrospective | 823             | OR 4.08, 95%CI 1.42-6.88 | NR                     | OR 0.76, 95%CI 0.11-5.07      | OR 0.56, 95%CI 0.28-1.14 | MD -1.59, 95%CI -2.27 to -0.90 |

f statistically significant \*; standard deviation or interquartile range; NR, not reported; †; study comparing outcomes of tip-in EMR vs. C-EMR; ‡; study comparing outcomes of EMR precutting vs. C-EMR; §; study comparing outcomes of EMR with ligation (EMR-L) vs. endoscopic submucosal dissection (ESD) for small (<=10 mm) rectal neuroendocrine tumors; OR, odds ratio; RR, relative risk; MD, mean difference; 95%CI, 95% confidence intervals

C-EMR, Conventional endoscopic mucosal resection; No., number
